# Supplementary material
Source: PubMed Central journal article supplement (PMC2657869)
Supplement: NIHMS3377-supplement-Supp_Table_S1.pdf [file NIHMS3377-supplement-Supp_Table_S1.pdf]

**Supplementary Table S1. FBAT *ICAMI* single SNP association results for malaria sub-phenotypes, and for severe malaria in specific populations.**

| SNP        | S               | E(S)   | Var(S) | P-value     | S                | E(S)   | Var(S) | P-value     | S                       | E(S)   | Var(S) | P-value      |
|------------|-----------------|--------|--------|-------------|------------------|--------|--------|-------------|-------------------------|--------|--------|--------------|
|            | Gambia Families |        |        |             | Malawi Families  |        |        |             | Kenya Families          |        |        |              |
| rs5490     | 213             | 220.50 | 98.25  | 0.45        | 111              | 103.00 | 46.00  | 0.24        | 105                     | 106.50 | 46.25  | 0.83         |
| rs5030340  | 51              | 51.00  | 25.00  | 1.00        | 27               | 30.00  | 15.00  | 0.44        | 22                      | 24.00  | 12.00  | 0.56         |
| rs5030344  | 56              | 57.00  | 28.50  | 0.85        | 14               | 16.50  | 8.25   | 0.38        | 17                      | 13.00  | 6.50   | 0.12         |
| rs5030351  | 180             | 192.50 | 89.25  | 0.19        | 118              | 106.00 | 46.00  | 0.08        | 116                     | 119.00 | 48.50  | 0.67         |
| rs5491     | 453             | 470.00 | 212.00 | 0.24        | 122              | 108.00 | 47.00  | <b>0.04</b> | 112                     | 110.50 | 44.75  | 0.82         |
| rs281432   | 213             | 220.50 | 98.25  | 0.45        | 79               | 80.50  | 37.25  | 0.81        | 91                      | 97.50  | 44.75  | 0.33         |
| rs5496     | 123             | 125.50 | 61.25  | 0.75        | 41               | 35.00  | 17.50  | 0.15        | 12                      | 19.00  | 9.50   | <b>0.02</b>  |
| rs5498     | 248             | 265.00 | 131.00 | 0.14        | 42               | 46.50  | 23.25  | 0.35        | 56                      | 56.50  | 27.75  | 0.92         |
| rs3093030  | 51              | 64.50  | 31.75  | <b>0.02</b> | 18               | 17.50  | 8.75   | 0.87        | 31                      | 30.00  | 15.00  | 0.80         |
| rs281438   | 365             | 369.00 | 126.50 | 0.72        | 157              | 154.00 | 53.50  | 0.68        | 162                     | 160.50 | 57.25  | 0.84         |
| rs2569693  | 47              | 53.00  | 26.00  | 0.24        | 12               | 10.50  | 5.25   | 0.51        | 28                      | 26.00  | 12.50  | 0.57         |
| rs281439   | 338             | 337.00 | 131.00 | 0.93        | 123              | 130.00 | 52.50  | 0.33        | 122                     | 122.50 | 52.75  | 0.95         |
| rs281440   | 276             | 281.50 | 119.25 | 0.61        | 74               | 84.50  | 38.25  | 0.09        | 111                     | 112.50 | 45.25  | 0.82         |
| rs2075741  | 120             | 136.00 | 65.50  | 0.05        | 43               | 41.50  | 19.75  | 0.74        | 58                      | 59.00  | 26.50  | 0.85         |
| rs11575074 | 91              | 90.50  | 44.25  | 0.94        | 46               | 48.50  | 23.75  | 0.61        | 35                      | 43.00  | 21.00  | 0.08         |
|            | Severe Malaria  |        |        |             | Cerebral Malaria |        |        |             | Severe Malarial Anaemia |        |        |              |
| rs5490     | 429             | 430.00 | 190.50 | 0.94        | 255              | 255.00 | 112.50 | 1.00        | 125                     | 129.50 | 56.25  | 0.55         |
| rs5030340  | 100             | 105.00 | 52.00  | 0.49        | 63               | 67.50  | 33.75  | 0.44        | 26                      | 27.50  | 13.75  | 0.69         |
| rs5030344  | 87              | 86.50  | 43.25  | 0.94        | 42               | 45.00  | 22.50  | 0.53        | 24                      | 21.00  | 10.50  | 0.35         |
| rs5030351  | 414             | 417.50 | 183.75 | 0.80        | 249              | 245.50 | 107.25 | 0.74        | 98                      | 115.50 | 51.75  | <b>0.015</b> |
| rs5491     | 687             | 688.50 | 303.75 | 0.93        | 362              | 341.50 | 151.75 | 0.10        | 159                     | 174.00 | 79.00  | 0.09         |
| rs281432   | 383             | 398.50 | 180.25 | 0.25        | 216              | 231.00 | 105.00 | 0.14        | 103                     | 108.00 | 48.50  | 0.47         |
| rs5496     | 176             | 179.50 | 88.25  | 0.71        | 99               | 97.00  | 47.50  | 0.77        | 52                      | 51.50  | 24.75  | 0.92         |
| rs5498     | 346             | 368.00 | 182.00 | 0.10        | 172              | 183.00 | 91.50  | 0.25        | 87                      | 94.50  | 45.25  | 0.26         |
| rs3093030  | 100             | 112.00 | 55.50  | 0.11        | 54               | 62.00  | 31.00  | 0.15        | 33                      | 33.00  | 16.00  | 1.00         |
| rs281438   | 684             | 683.50 | 237.25 | 0.97        | 406              | 392.00 | 139.00 | 0.24        | 196                     | 200.50 | 68.25  | 0.59         |
| rs2569693  | 87              | 89.50  | 43.75  | 0.71        | 44               | 50.00  | 25.00  | 0.23        | 25                      | 25.00  | 11.50  | 1.00         |
| rs281439   | 583             | 589.50 | 236.25 | 0.67        | 327              | 336.50 | 134.75 | 0.41        | 163                     | 168.50 | 68.75  | 0.51         |
| rs281440   | 461             | 478.50 | 202.75 | 0.22        | 255              | 274.50 | 117.25 | 0.07        | 116                     | 125.00 | 54.50  | 0.22         |
| rs2075741  | 221             | 236.50 | 111.75 | 0.14        | 123              | 134.00 | 64.50  | 0.17        | 71                      | 69.00  | 32.50  | 0.73         |
| rs11575074 | 172             | 182.00 | 89.00  | 0.29        | 97               | 104.50 | 51.25  | 0.29        | 51                      | 54.50  | 26.75  | 0.50         |

FBAT statistic ‘S’, expected FBAT statistic ‘E(S)’, variance ‘Var(S)’ and P-value are reported under the allelic model, for transmissions of the minor allele.
