# Supplementary material
Source: PubMed Central journal article supplement (PMC2657869)
Supplement: NIHMS3377-supplement-Supp_Table_S2.pdf [file NIHMS3377-supplement-Supp_Table_S2.pdf]

**Supplementary Table S2. Genotyping assay performance by study design and region of origin.**

| Study Site                     | Marker     | Success   | MAF   | HWE   | Study Site                                 | Marker     | Success                            | MAF    | HWE   |       |      |
|--------------------------------|------------|-----------|-------|-------|--------------------------------------------|------------|------------------------------------|--------|-------|-------|------|
| Family-based association study |            |           |       |       | Family-based association study (continued) |            |                                    |        |       |       |      |
| Gambia                         | rs5491*    | 99.8%     | 0.221 | 0.62  | Kenya                                      | rs5490     | 97.0%                              | 0.299  | 0.65  |       |      |
|                                | rs5498*    | 99.8%     | 0.115 | 0.72  |                                            | rs5030340  | 98.3%                              | 0.064  | 0.24  |       |      |
|                                | rs5490     | 96.4%     | 0.241 | 0.99  |                                            | rs5030344  | 99.7%                              | 0.019  | 0.76  |       |      |
|                                | rs5030340  | 97.4%     | 0.046 | 0.81  |                                            | rs5030351  | 98.9%                              | 0.325  | 0.71  |       |      |
|                                | rs5030344  | 99.8%     | 0.050 | 0.03  |                                            | rs5491     | 96.6%                              | 0.323  | 0.65  |       |      |
|                                | rs5030351  | 97.1%     | 0.211 | 0.68  |                                            | rs281432   | 98.4%                              | 0.278  | 0.43  |       |      |
|                                | rs281432   | 94.6%     | 0.261 | 0.36  |                                            | rs5496     | 97.9%                              | 0.058  | 0.77  |       |      |
|                                | rs5496     | 98.9%     | 0.116 | 0.21  |                                            | rs5498     | 98.4%                              | 0.142  | 0.42  |       |      |
|                                | rs3093030  | 94.1%     | 0.074 | 0.97  |                                            | rs3093030  | 99.4%                              | 0.065  | 0.29  |       |      |
|                                | rs281438   | 96.4%     | 0.465 | 0.56  |                                            | rs281438   | 99.0%                              | 0.444  | 0.42  |       |      |
|                                | rs2569693  | 78.1%     | 0.069 | 0.92  |                                            | rs2569693  | 97.7%                              | 0.054  | 0.40  |       |      |
|                                | rs281439   | 96.0%     | 0.413 | 0.33  |                                            | rs281439   | 98.9%                              | 0.332  | 0.14  |       |      |
|                                | rs281440   | 95.9%     | 0.321 | 0.26  |                                            | rs281440   | 94.7%                              | 0.339  | 0.63  |       |      |
|                                | rs2075741  | 99.0%     | 0.140 | 0.65  |                                            | rs2075741  | 99.9%                              | 0.132  | 0.26  |       |      |
|                                | rs11575074 | 98.1%     | 0.082 | 0.59  |                                            | rs11575074 | 99.6%                              | 0.123  | 0.36  |       |      |
|                                | Malawi     | rs5490    | 97.9% | 0.256 |                                            | 0.70       | Population-based association study |        |       |       |      |
|                                |            | rs5030340 | 99.0% | 0.082 |                                            | 0.67       | Gambia                             | rs5491 | 99.3% | 0.196 | 0.77 |
| rs5030344                      |            | 99.4%     | 0.045 | 0.48  | rs5498                                     | 99.5%      |                                    | 0.110  | 0.82  |       |      |
| rs5030351                      |            | 98.5%     | 0.260 | 0.80  | Malawi                                     | rs5491     | 99.6%                              | 0.296  | 0.51  |       |      |
| rs5491                         |            | 100.0%    | 0.258 | 0.77  |                                            | rs5498     | 98.8%                              | 0.149  | 0.37  |       |      |
| rs281432                       |            | 98.7%     | 0.217 | 0.36  | Kenya                                      | rs5491     | 99.1%                              | 0.284  | 0.14  |       |      |
| rs5496                         |            | 98.8%     | 0.076 | 0.23  |                                            | rs5498     | 99.4%                              | 0.134  | 0.76  |       |      |
| rs5498                         |            | 100.0%    | 0.129 | 0.66  |                                            |            |                                    |        |       |       |      |
| rs3093030                      |            | 99.1%     | 0.038 | 0.55  |                                            |            |                                    |        |       |       |      |
| rs281438                       |            | 98.4%     | 0.470 | 0.04  |                                            |            |                                    |        |       |       |      |
| rs2569693                      |            | 94.2%     | 0.023 | 0.74  |                                            |            |                                    |        |       |       |      |
| rs281439                       |            | 98.7%     | 0.401 | 0.75  |                                            |            |                                    |        |       |       |      |
| rs281440                       |            | 90.1%     | 0.334 | 0.88  |                                            |            |                                    |        |       |       |      |
| rs2075741                      |            | 99.1%     | 0.100 | 0.10  |                                            |            |                                    |        |       |       |      |
| rs11575074                     |            | 97.6%     | 0.129 | 0.74  |                                            |            |                                    |        |       |       |      |

NOTE.- HWE=Chi-squared test for Hardy-Weinberg equilibrium in controls, or Z-test for Hardy-Weinberg equilibrium in untransmitted parental alleles treated as a diploid genotype. Success = percentage of samples (cases, controls or parents) successfully genotyped for each marker. MAF = minor allele frequency. \* Results for 1320 Gambian trios, rest of Gambian family results represent those from 612 trios.
